# Supplementary material for: Adipose Mesenchymal Extracellular Vesicles as Alpha-1-Antitrypsin Physiological Delivery Systems for Lung Regeneration
Source: Cells. 2019 Aug 23;8(9):965. doi: 10.3390/cells8090965 (PMC6770759; doi:10.3390/cells8090965)
Supplement: Supplementary file 1 [file cells-08-00965-s001.xls]

## Sheet: Table S1
Table S1. Proteins secreted by human adipose-derived mesenchymal stromal cells and showing protease/peptidase activity, protease/peptidase inhibitor activity, response to bacterium or acute-phase response.
Annotations		Functional categories
Gene name	Protein names	Protease/peptidase inhibitor	Protease/peptidase activity	Acute-phase response	Defense response to bacterium
A2M	Alpha-2-macroglobulin	*
AEBP1	Adipocyte enhancer-binding protein 1		*
AGT	Angiotensinogen	*
AHSG	Alpha-2-HS-glycoprotein	*		*
AMBP	Protein AMBP [Cleaved into: Alpha-1-microglobulin	*
ANPEP	Aminopeptidase N		*
APCS	Serum amyloid P-component			*
B2M	Beta-2-microglobulin				*
C1R	Complement C1r subcomponent		*
C1RL	Complement C1r subcomponent-like protein		*
C1S	Complement C1s subcomponent		*
C3	Complement C3	*	*	*
C4A	Complement C4-A	*	*
C4B	Complement C4-B	*	*		*
C5	Complement C5	*
CCDC80	Coiled-coil domain-containing protein 80				*
CFB	Complement factor B		*
CHI3L1	Chitinase-3-like protein 1				*
COL6A3	Collagen alpha-3	*
CPN2	Carboxypeptidase N subunit 2		*
CTSK	Cathepsin K		*
CTSL	Cathepsin L1		*
F2	Prothrombin		*	*
FBLN1	Fibulin-1		*
FGA	Fibrinogen alpha chain				*
FGB	Fibrinogen beta chain				*
FGG	Fibrinogen gamma chain				*
FN1	Fibronectin		*	*
GAPDH	Glyceraldehyde-3-phosphate dehydrogenase	*			*
H2BFS	Histone H2B type F-S				*
HIST1H2BC	Histone H2B type 1-C/E/F/G/I				*
HIST1H2BJ	Histone H2B type 1-J				*
HIST1H2BK	Histone H2B type 1-K				*
HIST2H2BE	Histone H2B type 2-E				*
HP	Haptoglobin		*	*
HRG	Histidine-rich glycoprotein	*			*
HSPA8	Heat shock cognate 71 kDa protein				*
IGHA1	Immunoglobulin heavy constant alpha 1				*
IGHG1	Immunoglobulin heavy constant gamma 1		*		*
IGHG2	Immunoglobulin heavy constant gamma 2		*		*
IGHG3	Immunoglobulin heavy constant gamma 3		*		*
IGHG4	Immunoglobulin heavy constant gamma 4		*		*
IGHM	Immunoglobulin heavy constant mu				*
IGHV3-23	Immunoglobulin heavy variable 3-23		*		*
IGHV3-30	Immunoglobulin heavy variable 3-30		*		*
IGHV3-33	Immunoglobulin heavy variable 3-33		*		*
IGHV3-53	Immunoglobulin heavy variable 3-53		*		*
IGHV3-66	Immunoglobulin heavy variable 3-66				*
IGHV3-72	Immunoglobulin heavy variable 3-72				*
IGHV3-74	Immunoglobulin heavy variable 3-74				*
IGHV3OR16-12	Immunoglobulin heavy variable 3/OR16-12				*
IGHV3OR16-13	Immunoglobulin heavy variable 3/OR16-13				*
IGHV3OR16-9	Immunoglobulin heavy variable 3/OR16-9				*
IGHV4-34	Immunoglobulin heavy variable 4-34		*		*
IGHV4-39	Immunoglobulin heavy variable 4-39		*		*
IGHV4-59	Immunoglobulin heavy variable 4-59		*		*
IGHV4-61	Immunoglobulin heavy variable 4-61				*
IGKC	Immunoglobulin kappa constant		*		*
IGKV1-5	Immunoglobulin kappa variable 1-5		*
IGKV2-28	Immunoglobulin kappa variable 2-28		*
IGKV2-30	Immunoglobulin kappa variable 2-30		*
IGKV2D-30	Immunoglobulin kappa variable 2D-30		*
IGKV2D-40	Immunoglobulin kappa variable 2D-40		*
IGKV3-11	Immunoglobulin kappa variable 3-11		*
IGKV3-15	Immunoglobulin kappa variable 3-15		*
IGKV3-20	Immunoglobulin kappa variable 3-20		*		*
IGKV3D-20	Immunoglobulin kappa variable 3D-20		*
IGKV4-1	Immunoglobulin kappa variable 4-1		*
IGLC2	Immunoglobulin lambda constant 2				*
IGLC3	Immunoglobulin lambda constant 3				*
IGLC6	Immunoglobulin lambda constant 6				*
IGLC7	Immunoglobulin lambda constant 7				*
IGLL5	Immunoglobulin lambda-like polypeptide 5				*
IGLV3-25	Immunoglobulin lambda variable 3-25		*
IGLV3-27	Immunoglobulin lambda variable 3-27		*
ITIH1	Inter-alpha-trypsin inhibitor heavy chain H1	*
ITIH2	Inter-alpha-trypsin inhibitor heavy chain H2	*
ITIH4	Inter-alpha-trypsin inhibitor heavy chain H4	*		*
JCHAIN	Immunoglobulin J chain				*
MMP11	Stromelysin-3		*
MMP2	72 kDa type IV collagenase		*
ORM1	Alpha-1-acid glycoprotein 1			*
ORM2	Alpha-1-acid glycoprotein 2			*
PCOLCE	Procollagen C-endopeptidase enhancer 1		*
PGLYRP2	N-acetylmuramoyl-L-alanine amidase				*
PLG	Plasminogen		*
PSMA6	Proteasome subunit alpha type-6		*
PSMB1	Proteasome subunit beta type-1		*
SERPINA1	Alpha-1-antitrypsin	*		*
SERPINA3	Alpha-1-antichymotrypsin	*		*
SERPINC1	Antithrombin-III	*
SERPIND1	Heparin cofactor 2	*
SERPINE1	Plasminogen activator inhibitor 1	*			*
SERPINE2	Glia-derived nexin	*
SERPINF1	Pigment epithelium-derived factor	*
SERPINF2	Alpha-2-antiplasmin	*		*
SERPING1	Plasma protease C1 inhibitor	*
SERPINH1	Serpin H1	*
TIMP1	Metalloproteinase inhibitor 1	*
TIMP2	Metalloproteinase inhibitor 2	*
WFDC12	WAP four-disulfide core domain protein 12	*			*
		27	46	12	46

## Sheet: Table S2
Table S2. Centralities (Betweenness, Centroid and Node Degree) calculated for the network (290 nodes and 3836 interactions) reconstructed by combining proteins secreted by human adipose-derived mesenchymal stromal cells and Homo sapiens PPI data. In bold and red values resulted above the average calculated on whole network.
Annotations		Centralities
Gene name	Protein name	Betweenness	Centroid	Degree
UBC	ubiquitin C	26773.5	61	199
FN1	fibronectin 1	9574.31	-61	138
ALB	albumin	3469.22	-133	72
YWHAE	tyrosine 3-monooxygenase/tryptophan 5-monooxygenase activation protein, epsilon polypeptide	1581.4	-167	51
ACTB	actin, beta	1578.73	-127	85
VIM	vimentin	1356.26	-170	48
ALDOA	aldolase A, fructose-bisphosphate	1264.02	-142	66
ENO1	enolase 1, (alpha)	1184.82	-164	56
EEF1A1	eukaryotic translation elongation factor 1 alpha 1	1100.93	-151	70
THBS1	thrombospondin 1	1099.06	-171	46
PLG	plasminogen	1083.94	-154	54
YWHAZ	tyrosine 3-monooxygenase/tryptophan 5-monooxygenase activation protein, zeta polypeptide	1057.89	-142	77
P4HB	prolyl 4-hydroxylase, beta polypeptide	1043.34	-174	50
FGA	fibrinogen alpha chain	1013.02	-147	64
C3	complement component 3	1002.05	-205	24
FLNA	filamin A, alpha	989.834	-165	53
ACTN4	actinin, alpha 4	985.921	-131	76
IGLL5	immunoglobulin lambda-like polypeptide 5	980.395	-230	9
HSPA5	heat shock 70kDa protein 5 (glucose-regulated protein, 78kDa)	969.514	-141	73
ACTN1	actinin, alpha 1	932.296	-139	70
A2M	alpha-2-macroglobulin	811.355	-165	49
F2	coagulation factor II (thrombin)	795.339	-164	50
ACTG1	actin, gamma 1	794.51	-142	72
TF	transferrin	776.924	-193	30
KRT10	keratin 10	682.913	-158	54
HSPD1	heat shock 60kDa protein 1 (chaperonin)	681.723	-154	58
KRT1	keratin 1	677.894	-155	54
APOA1	apolipoprotein A-I	647.416	-175	42
VCP	valosin containing protein	644.296	-167	52
HIST1H2BJ	histone cluster 1, H2bj	642.88	-211	33
FGB	fibrinogen beta chain	638.882	-162	50
GAPDH	glyceraldehyde-3-phosphate dehydrogenase	592.184	-155	64
CFB	complement factor B	591.102	-175	44
IGHG1	Immunoglobulin heavy constant gamma 1	586.291	-256	4
INHBA	inhibin, beta A	577.439	-284	3
KRT9	keratin 9	571.012	-161	53
ACTA1	actin, alpha 1, skeletal muscle	570.581	-188	49
ADH1B	alcohol dehydrogenase 1B (class I), beta polypeptide	541.377	-257	5
SERPINA1	serpin peptidase inhibitor, clade A (alpha-1 antiproteinase, antitrypsin), member 1	533.738	-171	44
YWHAQ	tyrosine 3-monooxygenase/tryptophan 5-monooxygenase activation protein, theta polypeptide	512.194	-165	55
UBA52	ubiquitin A-52 residue ribosomal protein fusion product 1	502.937	-204	50
SERPINH1	serpin peptidase inhibitor, clade H (heat shock protein 47), member 1, (collagen binding protein 1)	488.273	-198	28
EEF2	eukaryotic translation elongation factor 2	464.43	-172	55
YWHAB	tyrosine 3-monooxygenase/tryptophan 5-monooxygenase activation protein, beta polypeptide	452.93	-169	51
TUBB	tubulin, beta class I	447.346	-159	62
MYH9	myosin, heavy chain 9, non-muscle	445.231	-160	62
GSTP1	glutathione S-transferase pi 1	431.897	-236	5
HIST1H2BC	histone cluster 1, H2bc	427.53	-191	49
CLU	clusterin	419.133	-170	47
SERPINA3	serpin peptidase inhibitor, clade A (alpha-1 antiproteinase, antitrypsin), member 3	410.406	-185	37
COL1A1	collagen, type I, alpha 1	407.327	-199	28
HSPA8	heat shock 70kDa protein 8	404.971	-163	60
TPM3	tropomyosin 3	396.585	-189	39
TUBA1A	tubulin, alpha 1a	396.423	-169	60
SERPINE1	serpin peptidase inhibitor, clade E (nexin, plasminogen activator inhibitor type 1), member 1	387.726	-178	40
ANXA1	annexin A1	377.193	-185	30
HIST1H2BD	histone cluster 1, H2bd	375.738	-212	46
UBB	ubiquitin B	374.988	-187	44
HP	haptoglobin	362.256	-175	42
LGALS3BP	lectin, galactoside-binding, soluble, 3 binding protein	361.644	-172	44
PSMA6	proteasome (prosome, macropain) subunit, alpha type, 6	348.317	-219	19
MYL6	myosin, light chain 6, alkali, smooth muscle and non-muscle	344.135	-192	40
APCS	amyloid P component, serum	343.53	-209	26
YWHAG	tyrosine 3-monooxygenase/tryptophan 5-monooxygenase activation protein, gamma polypeptide	342.783	-173	46
B2M	beta-2-microglobulin	333.638	-214	20
GSN	gelsolin	331.033	-187	35
TXN	thioredoxin	325.24	-189	35
RPS27A	ribosomal protein S27a	324.035	-190	44
LDHA	lactate dehydrogenase A	318.591	-190	35
ACTC1	actin, alpha, cardiac muscle 1	313.451	-200	43
ACTR3	ARP3 actin-related protein 3 homolog (yeast)	303.888	-189	45
VCL	vinculin	299.254	-169	49
HADH	hydroxyacyl-CoA dehydrogenase	281.853	-255	6
RAP1B	RAP1B, member of RAS oncogene family	279.277	-193	34
FGG	fibrinogen gamma chain	275.421	-167	45
AMBP	alpha-1-microglobulin/bikunin precursor	270.888	-226	13
SERPING1	serpin peptidase inhibitor, clade G (C1 inhibitor), member 1	270.454	-165	51
TIMP1	TIMP metallopeptidase inhibitor 1	267.538	-186	34
TUBB2A	tubulin, beta 2A class IIa	266.899	-186	48
HIST1H4A	histone cluster 1, H4a	264.665	-200	35
HIST1H3D	histone cluster 1, H3d	255.963	-239	37
RAP1A	RAP1A, member of RAS oncogene family	246.658	-194	36
SPARC	secreted protein, acidic, cysteine-rich (osteonectin)	246.263	-184	35
CFH	complement factor H	246.169	-202	26
AHSG	alpha-2-HS-glycoprotein	242.319	-168	48
DCN	decorin	221.114	-207	24
C1S	complement component 1, s subcomponent	217.564	-221	28
C5	complement component 5	217.197	-227	14
CFL1	cofilin 1 (non-muscle)	216.52	-184	40
HIST1H2AJ	histone cluster 1, H2aj	204.136	-225	35
CLTC	clathrin, heavy chain (Hc)	201.005	-184	41
TTR	transthyretin	199.355	-182	35
TUBA1C	tubulin, alpha 1c	198.785	-185	47
PF4	platelet factor 4	195.918	-181	37
HLA-B	major histocompatibility complex, class I, B	195.271	-236	24
HIST2H2BE	histone cluster 2, H2be	187.845	-227	40
C1R	complement component 1, r subcomponent	186.848	-216	25
TPM4	tropomyosin 4	185.47	-207	28
COL18A1	collagen, type XVIII, alpha 1	184.228	-223	20
CAP1	CAP, adenylate cyclase-associated protein 1 (yeast)	183.569	-207	25
CCT6A	chaperonin containing TCP1, subunit 6A (zeta 1)	177.384	-183	46
HIST1H2AD	histone cluster 1, H2ad	175.174	-205	35
MMP2	matrix metallopeptidase 2 (gelatinase A, 72kDa gelatinase, 72kDa type IV collagenase)	172.28	-236	12
PPIA	peptidylprolyl isomerase A (cyclophilin A)	171.863	-205	27
COL1A2	collagen, type I, alpha 2	170.023	-209	22
HIST1H2AG	histone cluster 1, H2ag	169.183	-216	32
TKT	transketolase	166.316	-207	29
VTN	vitronectin	164.012	-245	14
APOA2	apolipoprotein A-II	161.931	-195	27
SERPINF2	serpin peptidase inhibitor, clade F (alpha-2 antiplasmin, pigment epithelium derived factor), member 2	161.05	-182	37
TAGLN2	transgelin 2	153.912	-195	38
ZYX	zyxin	150.515	-201	21
HPX	hemopexin	149.803	-210	24
HIST1H2BK	histone cluster 1, H2bk	143.007	-210	34
CALR	calreticulin	139.947	-198	25
TNC	tenascin C	139.713	-218	13
HIST1H2AB	histone cluster 1, H2ab	139.648	-241	30
APOB	apolipoprotein B (including Ag(x) antigen)	136.662	-216	23
ACAN	aggrecan	136.006	-243	18
CLTCL1	clathrin, heavy chain-like 1	135.009	-224	22
EZR	ezrin	134.653	-205	23
APOE	apolipoprotein E	131.41	-190	28
MDH2	malate dehydrogenase 2, NAD (mitochondrial)	131.051	-204	27
SOD1	superoxide dismutase 1, soluble	130.393	-212	24
ITIH4	inter-alpha-trypsin inhibitor heavy chain family, member 4	129.299	-196	30
IGFBP7	insulin-like growth factor binding protein 7	129.048	-284	2
HSPA2	heat shock 70kDa protein 2	127.905	-237	30
SERPINC1	serpin peptidase inhibitor, clade C (antithrombin), member 1	122.698	-227	15
COL5A1	collagen, type V, alpha 1	122.077	-209	21
ANK2	ankyrin 2, neuronal	119.85	-244	20
PPIB	peptidylprolyl isomerase B (cyclophilin B)	117.676	-232	21
TLN1	talin 1	117.496	-196	29
EFEMP1	EGF containing fibulin-like extracellular matrix protein 1	113.192	-263	4
C2	complement component 2	108.877	-226	25
MMRN1	multimerin 1	107.13	-177	38
LDHB	lactate dehydrogenase B	106.833	-201	34
COL6A1	collagen, type VI, alpha 1	104.486	-210	20
ADH1A	alcohol dehydrogenase 1A (class I), alpha polypeptide	98.9351	-281	4
TGFBI	transforming growth factor, beta-induced, 68kDa	94.1698	-224	16
FAM3C	family with sequence similarity 3, member C	92.0078	-190	31
LUM	lumican	89.4689	-239	17
ACTR3B	ARP3 actin-related protein 3 homolog B (yeast)	89.294	-213	34
SERPINF1	serpin peptidase inhibitor, clade F (alpha-2 antiplasmin, pigment epithelium derived factor), member 1	87.9974	-225	12
TUBB2B	tubulin, beta 2B class IIb	84.4748	-207	36
MSN	moesin	83.8268	-214	23
HBB	hemoglobin, beta	83.7336	-210	15
PKM	pyruvate kinase, muscle	83.3849	-208	25
TPI1	triosephosphate isomerase 1	82.0656	-230	21
TUBB1	tubulin, beta 1 class VI	81.2704	-236	27
COL3A1	collagen, type III, alpha 1	80.9775	-220	21
LGALS1	lectin, galactoside-binding, soluble, 1	79.3791	-214	16
HIST1H2BO	histone cluster 1, H2bo	78.7578	-242	34
LAMB1	laminin, beta 1	77.7051	-258	9
RAD23B	RAD23 homolog B (S. cerevisiae)	77.4178	-240	17
ACTBL2	actin, beta-like 2	77.0834	-216	31
SERPIND1	serpin peptidase inhibitor, clade D (heparin cofactor), member 1	75.5881	-214	22
ANXA2	annexin A2	72.1829	-202	24
NME2	NME/NM23 nucleoside diphosphate kinase 2	71.4131	-221	27
NID1	nidogen 1	67.2403	-250	10
BGN	biglycan	66.8654	-247	14
HSPA1B	heat shock 70kDa protein 1B	65.5163	-193	32
ACTR3C	ARP3 actin-related protein 3 homolog C (yeast)	64.7682	-214	33
SUCLA2	succinate-CoA ligase, ADP-forming, beta subunit	64.6246	-246	17
C4A	complement component 4A (Rodgers blood group)	62.8559	-245	12
HIST1H2AC	histone cluster 1, H2ac	62.2957	-239	34
SNRPD1	small nuclear ribonucleoprotein D1 polypeptide 16kDa	61.3083	-218	17
AGT	angiotensinogen (serpin peptidase inhibitor, clade A, member 8)	59.7909	-238	14
LAMC1	laminin, gamma 1 (formerly LAMB2)	59.3274	-264	7
TUBA1B	tubulin, alpha 1b	59.2944	-211	27
EEF1A2	eukaryotic translation elongation factor 1 alpha 2	58.1052	-224	25
TUBB4B	tubulin, beta 4B class IVb	57.7398	-202	30
HSPA1L	heat shock 70kDa protein 1-like	56.299	-213	28
H2AFJ	H2A histone family, member J	55.9434	-246	31
FBLN1	fibulin 1	54.9803	-243	8
ANPEP	alanyl (membrane) aminopeptidase	53.7949	-237	9
GDI2	GDP dissociation inhibitor 2	52.9793	-206	28
CTSL	cathepsin L1	50.9185	-234	9
MFAP4	microfibrillar-associated protein 4	50.4314	-255	12
HIST3H2A	histone cluster 3, H2a	50.2602	-245	30
RDX	radixin	50.2598	-224	21
MRPS21	mitochondrial ribosomal protein S21	49.0294	-248	7
FBLN2	fibulin 2	48.8276	-254	7
COL15A1	collagen, type XV, alpha 1	48.5478	-248	14
COL6A3	collagen, type VI, alpha 3	48.0588	-223	17
TUBB6	tubulin, beta 6 class V	47.8065	-215	25
C1RL	complement component 1, r subcomponent-like	47.4996	-239	19
APOA4	apolipoprotein A-IV	47.1502	-200	24
HIST1H2BH	histone cluster 1, H2bh	46.862	-244	33
PFN1	profilin 1	46.6811	-204	30
LAMB2	laminin, beta 2 (laminin S)	44.7717	-269	7
RAI14	retinoic acid induced 14	44.5847	-242	22
MCM4	minichromosome maintenance complex component 4	43.2061	-239	17
LAMA4	laminin, alpha 4	42.7902	-247	8
QSOX1	quiescin Q6 sulfhydryl oxidase 1	40.8324	-191	30
TUBB3	tubulin, beta 3 class III	40.6984	-244	24
RPLP1	ribosomal protein, large, P1	39.4701	-236	21
TUBB8	tubulin, beta 8 class VIII	38.8005	-247	19
PCOLCE	procollagen C-endopeptidase enhancer	38.7546	-241	10
MDH1	malate dehydrogenase 1, NAD (soluble)	38.0812	-229	21
HIST1H2BN	histone cluster 1, H2bn	37.6015	-243	32
HBA1	hemoglobin, alpha 1	34.2069	-231	13
COL12A1	collagen, type XII, alpha 1	34.0369	-247	14
COL6A2	collagen, type VI, alpha 2	33.0664	-222	14
C4B	complement component 4B (Chido blood group)	32.3096	-241	10
LMNA	lamin A/C	31.3613	-198	25
HLA-C	major histocompatibility complex, class I, C	28.6567	-254	12
TUBB4A	tubulin, beta 4A class IVa	26.3268	-240	26
SOD2	superoxide dismutase 2, mitochondrial	26.2548	-250	11
RSU1	Ras suppressor protein 1	25.477	-222	14
TSNAX	translin-associated factor X	24.8543	-234	8
HSPA6	heat shock 70kDa protein 6 (HSP70B')	22.7232	-230	22
CALU	calumenin	21.3044	-256	12
HIST2H2AC	histone cluster 2, H2ac	19.6245	-241	32
S100A11	S100 calcium binding protein A11	19.2759	-234	17
HIST1H2BB	histone cluster 1, H2bb	19.127	-243	32
TIMP2	TIMP metallopeptidase inhibitor 2	18.9463	-269	5
COPE	coatomer protein complex, subunit epsilon	18.3426	-237	7
HIST2H2AA3	histone cluster 2, H2aa3	18.1724	-242	31
HIST1H2BA	histone cluster 1, H2ba	17.3558	-245	32
PSMB1	proteasome (prosome, macropain) subunit, beta type, 1	17.1498	-230	12
MMP11	matrix metallopeptidase 11 (stromelysin 3)	14.5048	-271	5
IGKV3D-7	Uncharacterized protein	14.4229	-256	5
CP	ceruloplasmin (ferroxidase)	12.8455	-225	10
PSAP	prosaposin	12.3042	-260	6
SDF4	stromal cell derived factor 4	11.3545	-237	12
LDHAL6B	lactate dehydrogenase A-like 6B	11.3468	-254	13
HIST2H2BF	histone cluster 2, H2bf	10.85	-248	30
KRT72	keratin 72	10.5847	-231	7
HIST1H2AH	histone cluster 1, H2ah	10.2345	-246	29
HIST1H2BL	histone cluster 1, H2bl	9.65702	-247	31
HIST1H2BM	histone cluster 1, H2bm	9.65702	-247	31
HIST3H2BB	histone cluster 3, H2bb	9.65702	-247	31
TXNRD1	thioredoxin reductase 1	8.31876	-257	13
CTSK	cathepsin K	7.98664	-261	5
HRG	histidine-rich glycoprotein	7.89732	-196	30
RNH1	ribonuclease/angiogenin inhibitor 1	6.13723	-236	5
NME1-NME2	NME1-NME2 readthrough	5.73991	-261	12
PDZRN4	PDZ domain containing ring finger 4	5.09514	-212	23
PF4V1	platelet factor 4 variant 1	4.47389	-214	22
IGKC	Immunoglobulin kappa constant	4.40169	-275	3
PGM1	phosphoglucomutase 1	4.32108	-248	13
SOD3	superoxide dismutase 3, extracellular	4.2671	-265	8
MARCKS	myristoylated alanine-rich protein kinase C substrate	3.54651	-241	18
GPI	glucose-6-phosphate isomerase	3.43702	-259	10
MXRA5	matrix-remodelling associated 5	3.25971	-265	10
CPN2	carboxypeptidase N, polypeptide 2	3.25971	-266	9
SERPINE2	serpin peptidase inhibitor, clade E (nexin, plasminogen activator inhibitor type 1), member 2	3.1348	-263	9
PLEK	pleckstrin	2.91086	-258	6
GC	group-specific component (vitamin D binding protein)	2.86313	-266	3
STOM	stomatin	2.29713	-242	5
PTX3	pentraxin 3, long	2.18397	-267	5
BASP1	brain abundant, membrane attached signal protein 1	2.15595	-273	7
JCHAIN	immunoglobulin J polypeptide, linker protein for immunoglobulin alpha and mu polypeptides	1.71616	-278	2
ANXA5	annexin A5	1.36827	-262	9
CEP128	centrosomal protein 128kDa	0.820513	-283	3
AZGP1	alpha-2-glycoprotein 1, zinc-binding	0.817647	-278	5
S100A6	S100 calcium binding protein A6	0.315152	-276	5
POSTN	periostin, osteoblast specific factor	0.238385	-275	11
PHACTR1	phosphatase and actin regulator 1	0.176637	-271	8
ORM2	orosomucoid 2	0	-197	29
ORM1	orosomucoid 1	0	-197	29
A1BG	alpha-1-B glycoprotein	0	-197	29
ITIH1	inter-alpha-trypsin inhibitor heavy chain 1	0	-217	21
MBD5	methyl-CpG binding domain protein 5	0	-275	11
SLC16A1	solute carrier family 16, member 1 (monocarboxylic acid transporter 1)	0	-261	7
HRNR	hornerin	0	-272	4
CFHR3	complement factor H-related 3	0	-269	3
PSD4	pleckstrin and Sec7 domain containing 4	0	-279	3
ITIH2	inter-alpha-trypsin inhibitor heavy chain 2	0	-247	2
IGKV2-40	Immunoglobulin kappa variable 2-40	0	-277	2
THBS2	thrombospondin 2	0	-283	2
ADH1C	Alcohol dehydrogenase 1C	0	-285	2
CSF1	colony stimulating factor 1 (macrophage)	0	-286	2
NBAS	neuroblastoma amplified sequence	0	-287	2
SGO2	shugoshin-like 2 (S. pombe)	0	-288	1
ENPP2	ectonucleotide pyrophosphatase/phosphodiesterase 2	0	-288	1
GPNMB	glycoprotein (transmembrane) nmb	0	-288	1
IGLC7	Immunoglobulin lambda constant 7	0	-288	1
TCEAL3	transcription elongation factor A (SII)-like 3	0	-288	1
FSTL1	follistatin-like 1	0	-288	1
KRT73	keratin 73	0	-288	1
KRT71	keratin 71	0	-288	1
SRPX	sushi-repeat containing protein, X-linked	0	-288	1
SLC20A2	solute carrier family 20 (phosphate transporter), member 2	0	-288	1
SH3BGRL3	SH3 domain binding glutamic acid-rich protein like 3	0	-288	1
IGLC2	Immunoglobulin lambda constant 2	0	-288	1
KRT74	keratin 74	0	-288	1
IGHG2	Immunoglobulin heavy constant gamma 2	0	-288	1
IGKV3-20	Immunoglobulin kappa variable 3-20	0	-288	1
IGFBP4	insulin-like growth factor binding protein 4	0	-288	1
